# Supplementary material
Source: publisher figshare collection journal article supplement (https://acs.figshare.com/ndownloader/files/4554838)
Supplement: Supplementary file 1 [file 4554838]

## Supporting Information

### **A novel small-molecule inhibitor of the avian influenza H5N1 virus determined through computational screening against the neuraminidase**

*Jianghong An<sup>1</sup>, Davy C. W. Lee<sup>2</sup>, Anna H.Y. Law<sup>2</sup>, Cindy L.H. Yang<sup>2</sup>, Leo L.M. Poon<sup>2</sup>,  
Allan S.Y. Lau<sup>2\*</sup>, Steven J.M. Jones<sup>1\*</sup>*

<sup>1</sup> British Columbia Cancer Agency Genome Sciences Centre, 675 West 10th Avenue,  
Vancouver, British Columbia V5Z 4S6, Canada.

<sup>2</sup> Immunology Research Laboratory, Department of Paediatrics and Adolescent Medicine,  
Li Ka Shing Faculty of Medicine, The University of Hong Kong, Pokfulam, Hong Kong,  
Special Administrative Region, China.

\* Corresponding authors

Allan S.Y. Lau, LKS Faculty of Medicine Building, 21 Sassoon Road, Pokfulam, Hong  
Kong, China. Tel 852-28554269. Fax 852-28198142. E-mail [asylau@hkucc.hku.hk](mailto:asylau@hkucc.hku.hk)

Steven J.M. Jones, 675 West 10th Avenue, Vancouver, British Columbia V5Z 4S6,  
Canada. Tel 604-877-6083. Fax 604-876-3561. E-mail [sjones@bcgsc.ca](mailto:sjones@bcgsc.ca)

## **Table of Content**

**Table S1.** Test of toxicity of compounds in primary macrophages and MDCK cells using MTT assay

**Table S2.** The 20 novel compounds selected for testing in mammalian cell-lines

**Figure S3.** Analysis of compound **1** was performed by an Agilent 1200 Series System interfaced to a G1315c photodiode array detector equipped with a Waters Atlantis<sup>®</sup> HILIC silica column

## **Method**

**Table S1.** Test of toxicity of compounds in primary macrophages and MDCK cells using MTT assay.

| ASL no. | Macrophage | MDCK |
|---------|------------|------|
| #1      | 1.1        | 2.2  |
| #2      | 1.1        | 1.5  |
| #3      | 1.1        | 2.2  |
| #4      | 1.0        | 1.2  |
| #5      | 1.0        | 2.3  |
| #6      | *1.0       | 1.1  |
| #7      | 0.9        | 1.7  |
| #8      | *1.1       | 1.1  |
| #9      | *1.1       | 1.0  |
| #10     | 0.9        | 1.2  |
| #11     | 0.9        | 1.3  |
| #12     | 0.9        | 1.5  |
| #13     | *1.1       | 0.7  |
| #14     | 1.0        | 1.4  |
| #15     | 0.7        |      |
| #16     | 0.9        |      |
| #17     | 1.0        |      |
| #18     | 0.8        |      |
| #19     | 0.1        |      |
| #20     | 0.8        |      |
| DMSO    | 1.0        | 1.0  |

(Concentration of tested compounds, 100uM; \*10uM)

**Table S2.** The 20 novel compounds selected for testing within mammalian cell-lines.

| No | NSC#   | ICM Score<br>(kcal/mol) | Protein structure            | PDB code | Testing<br>Result |
|----|--------|-------------------------|------------------------------|----------|-------------------|
| 1  | 89853  | -47.25                  | N1(apo)                      | 2hty     | Inhibitory        |
| 2  | 637682 | -47.05                  | N1(complex with oseltamivir) | 2hu4     |                   |
| 3  | 332542 | -44.80                  | N1(complex with oseltamivir) | 2hu4     |                   |
| 4  | 119437 | -43.78                  | N1(complex with oseltamivir) | 2hu4     |                   |
| 5  | 210268 | -43.25                  | N1(complex with oseltamivir) | 2hu4     |                   |
| 6  | 56681  | -42.20                  | N1(apo)                      | 2hty     |                   |
| 7  | 161061 | -42.04                  | N1(complex with oseltamivir) | 2hu4     |                   |
| 8  | 289523 | -41.75                  | N4(apo)                      | 2htv     | Toxic             |
| 9  | 112915 | -41.62                  | N1(complex with oseltamivir) | 2hu4     |                   |
| 10 | 289517 | -41.28                  | N1(apo)                      | 2hty     |                   |
| 11 | 317609 | -41.25                  | N1(apo)                      | 2hty     |                   |
| 12 | 92812  | -40.79                  | N1(complex with oseltamivir) | 2hu4     |                   |
| 13 | 97424  | -40.61                  | N1(apo)                      | 2hty     |                   |
| 14 | 15153  | -40.18                  | N1(complex with oseltamivir) | 2hu4     |                   |
| 15 | 174493 | -39.97                  | N1(complex with oseltamivir) | 2hu4     | Toxic             |
| 16 | 333447 | -38.19                  | N4(apo)                      | 2htv     |                   |
| 17 | 343727 | -36.64                  | N1(complex with oseltamivir) | 2hu4     |                   |
| 18 | 614938 | -36.36                  | N1(complex with oseltamivir) | 2hu4     |                   |
| 19 | 32200  | -35.80                  | N1(complex with oseltamivir) | 2hu4     |                   |
| 20 | 43129  | -34.70                  | N1(complex with oseltamivir) | 2hu4     |                   |

**Figure S3.** Analysis of compound **1** was performed by an Agilent 1200 series system interfaced to a G1315c photodiode array detector equipped with a Waters Atlantis<sup>®</sup> HILIC silica column. After calculation, the purity of compound **1** (with \*) at absorbance 210, 254, and 280nm was determined to be higher than 95%.

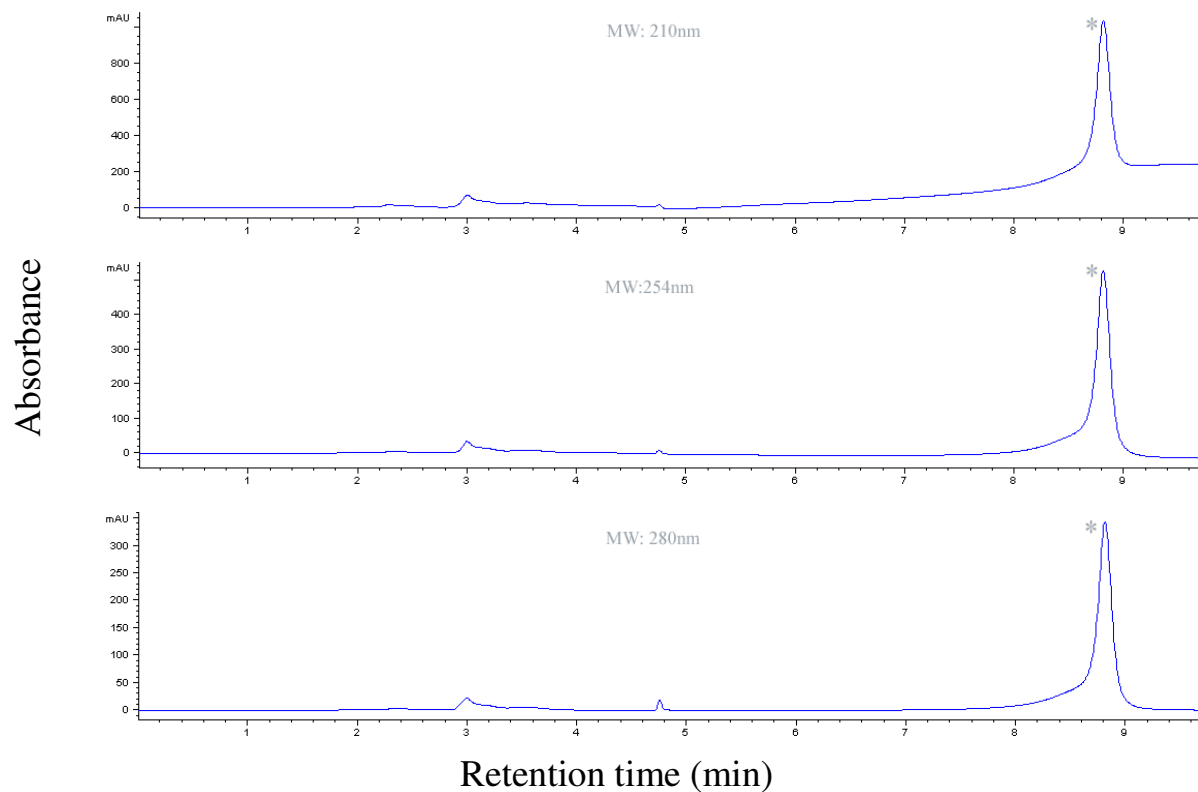

## Methods

**Cell viability test.** Primary human blood macrophages or MDCK cells were seeded at  $2 \times 10^6$ /ml in a 96-well plate for 16-24 hours. Various concentrations including 1uM, 10uM and 100uM of the indicated compounds were added to the cells. Same concentrations of DMSO were added to the cells as controls. Cells were incubated at 37°C and 5%CO<sub>2</sub> for 72 hours, and then Thiazolyl Blue Tetrazolium Bromide (MTT) was added to a final concentration of 0.1mg/ml. After two hours, the culture supernatant was removed and each well was replenished with isopropanol. The MTT metabolic product, formazan, was dissolved in isopropanol for five minutes with shaking. The optical densities of formazan and background were measured at 560nm and 670nm, respectively.
